# Supplementary material
Source: Research Square preprint supplement (doi:10.21203/rs.3.rs-8966841/v1)

**eTable 1.** General Search Strategies for PubMed, Embase and Cochrane Library.

**eTable 2.** List of Included and Excluded Studies.

**eTable 3.** Analysis of publication bias for outcomes between ULIF and MIS-TLIF by non-parametric T-F method.

**eFigure 1.** Funnel plots for meta-analysis of association between VAS score and ULIF versus MIS-TLIF .

**eFigure 2.** Funnel plots for meta-analysis of association between VAS score and ULIF versus MIS-TLIF by non-parametric T-F method.

**eFigure 3.** Funnel plots for meta-analysis of association between ODI score and ULIF versus MIS-TLIF .

**eFigure 4.** Begg’test for meta-analysis of association between ODI score (1 month) and ULIF versus MIS-TLIF.

**eFigure 5.** Sensitivity Analysis for Operative time of ULIF versus MIS-TLIF .

**eFigure 6.** Funnel plots for meta-analysis of association between Operative time and ULIF versus MIS-TLIF .

**eFigure 7.** Funnel plots for meta-analysis of association between Operative time and ULIF versus MIS-TLIF by non-parametric T-F method.

**eFigure 8.** Sensitivity Analysis for Blood loss of ULIF versus MIS-TLIF.

**eFigure 9.**Funnel plots for meta-analysis of association between Blood loss and ULIF versus MIS-TLIF.

**eFigure 10.** Funnel plots for meta-analysis of association between Blood loss and ULIF versus MIS-TLIF by non-parametric T-F method.

**eFigure 11.** Sensitivity Analysis for Hospital stay of ULIF versus MIS-TLIF.

**eFigure 12.** Funnel plots for meta-analysis of association between Hospital stay and ULIF versus MIS-TLIF.

**eTable 1**. General Search Strategies for PubMed, Embase and Cochrane Library.

**Text S1 Search strategy**

**Database: PubMed from inception to Present> (Search date:** **April15, 2025)**

**Search Strategy:**

**--------------------------------------------------------------------------------**

**Unilateral Lumbar Interbody Fusion terms(I)**

#1 "Spine/surgery"[Mesh]

#2 "Endoscopy"[Mesh]

#3 "Spinal Stenosis"[Mesh]

#4 (Column*, Spinal OR Vertebra* OR Surgical Procedure* OR Endoscopic Surgical OR Endoscopy, Surgical OR Stenos?s, Spinal OR UBE OR Unilateral Biportal Endoscopy) [Title/Abstract]

#5 #1-4/or (805,606)

**Minimally Invasive Transforaminal Lumbar Interbody Fusion terms(C)**

#6 "Spinal Fusion"[Mesh]

#7 "Minimally Invasive Surgery"[Mesh]

#8 (Transforaminal Lumbar Interbody Fusion OR Lumbar Interbody Fusion OR Disc Herniat* OR Protruded Disc OR Disk Protrusion OR Intervertebral Disc Herniation OR Intervertebral Disk Herniation OR Minimally Invasive Surger* OR MIS-TLIF OR TLIF OR MIS OR minimally invasive spine surgery) [Title/Abstract]

#9 #6-8/or (709,505)

**Spinal Degenerative Diseases terms(P)**

#10 "Low back pain"[Mesh]

#11 "Intervertebral Disc Degeneration/surgery"[Mesh]

#12 "Intervertebral Disc Displacement"[Mesh]

#13 (Intervertebral Disc Degeneration OR Degenerative Disc Disease OR Disc Degradation OR Herniated Disc OR Prolapsed Disc OR Protruded Disc OR Intervertebral Disc Herniation OR Intervertebral Disc Protrusion OR Disc Displacement OR Intervertebral Disc Displacements) [Title/Abstract]

#14 #10-13/or (58,153)

**Final search results: Combining** **ULIF and MIS-TLIF and spinal Degenerative Diseases terms:**

#15 #5 AND #9 AND #14 (7,920)

**Text S2 Search strategy**

**Database: EMBASE from inception to Present> (Search date: April15, 2025)**

**Search Strategy:**

**--------------------------------------------------------------------------------**

**Unilateral Lumbar Interbody Fusion terms(I)**

#1 'Spine/surgery '/exp

#2 'Endoscopy'/exp

#3 'Spinal Stenosis'/exp

#4 (Column*, Spinal OR Vertebra* OR Surgical Procedure* OR Endoscopic Surgical OR Endoscopy, Surgical OR Stenos?s, Spinal OR UBE OR Unilateral Biportal Endoscopy) : ab,ti

#5 #1-4/or (979,422)

**Minimally Invasive Transforaminal Lumbar Interbody Fusion terms(C)**

#6 'Spinal Fusion '/exp

#7 'Minimally Invasive Surgery '/exp

#8 (Transforaminal Lumbar Interbody Fusion OR Lumbar Interbody Fusion OR Disc Herniat* OR Protruded Disc OR Disk Protrusion OR Intervertebral Disc Herniation OR Intervertebral Disk Herniation OR Minimally Invasive Surger* OR MIS-TLIF OR TLIF OR MIS OR minimally invasive spine surgery): ab,ti

#9 #6-8/or (105,887)

**Spinal Degenerative Diseases terms(P)**

#10 "Low back pain '/exp

#11 'Intervertebral Disc Degeneration/surgery '/exp

#12 'Intervertebral Disc Displacement '/exp

#13(Intervertebral Disc Degeneration OR Degenerative Disc Disease OR Disc Degradation OR Herniated Disc OR Prolapsed Disc OR Protruded Disc OR Intervertebral Disc Herniation OR Intervertebral Disc Protrusion OR Disc Displacement OR Intervertebral Disc Displacements): ab,ti

#14 #10-13/or (116,107)

**Final search results: Combining ULIF and MIS-TLIF and spinal Degenerative Diseases terms:**

#15 #5 AND #9 AND #14 (9,058)

**Text S3 Search strategy**

**Database: Cochrane Library from inception to Present> (Search date: April15, 2025)**

**Search Strategy:**

**--------------------------------------------------------------------------------**

**Unilateral Lumbar Interbody Fusion terms(I)**

#1 MeSH descriptor: [Spine/surgery] explode all trees

#2 MeSH descriptor: [Endoscopy] explode all trees

#3 MeSH descriptor: [Spinal Stenosis] explode all trees

#4 ((Column*, Spinal OR Vertebra* OR Surgical Procedure* OR Endoscopic Surgical OR Endoscopy, Surgical OR Stenos?s, Spinal OR UBE OR Unilateral Biportal Endoscopy)): ti,ab,kw (Word variations have been searched)

#5 #1-4/or (141,495)

**Minimally Invasive Transforaminal Lumbar Interbody Fusion terms(C)**

#6 MeSH descriptor: [Spinal Fusion] explode all trees

#7 MeSH descriptor: [Minimally Invasive Surgery] explode all trees

#8 ((Transforaminal Lumbar Interbody Fusion OR Lumbar Interbody Fusion OR Disc Herniat* OR Protruded Disc OR Disk Protrusion OR Intervertebral Disc Herniation OR Intervertebral Disk Herniation OR Minimally Invasive Surger* OR MIS-TLIF OR TLIF OR MIS OR minimally invasive spine surgery)): ti,ab,kw

#9 #6-8/or (12,873)

**Spinal Degenerative Diseases terms(P)**

#10 MeSH descriptor: [Low back pain] explode all trees

#11 MeSH descriptor: [Intervertebral Disc Degeneration/surgery] explode all trees

#12 MeSH descriptor: [Intervertebral Disc Displacement] explode all trees

#13 ((Intervertebral Disc Degeneration OR Degenerative Disc Disease OR Disc Degradation OR Herniated Disc OR Prolapsed Disc OR Protruded Disc OR Intervertebral Disc Herniation OR Intervertebral Disc Protrusion OR Disc Displacement OR Intervertebral Disc Displacements)): ti,ab,kw

#14 #10-13/or (5,566)

**Final search results: Combining ULIF and MIS-TLIF and spinal Degenerative Diseases terms:**

#15 #5 AND #9 AND #14 (2,452)

**eTable2.** List of Included and Excluded Studies.

| Included and excluded reasons | No. studies | References. |
| --- | --- | --- |
| Included studies | 14 | [1-14] |
| Review or meta-analysis | 4 | [15-18] |
| Inadequate outcome data | 3 | [19-21] |
| Not relevant | 2 | [22, 23] |
| The literature is not English | 9 | [24-32] |

1. Ge, M., et al., *Comparison of hidden blood loss and clinical efficacy of percutaneous endoscopic transforaminal lumbar interbody fusion and minimally invasive transforaminal lumbar interbody fusion.* International Orthopaedics, 2022. **46**(9): p. 2063-2070.

2. Guo, W., et al., *Clinical comparison of unilateral biportal endoscopic transforaminal lumbar interbody fusion verse 3D microscope-assisted transforaminal lumbar interbody fusion in the treatment of single-segment lumbar spondylolisthesis with lumbar spinal stenosis: a retrospective study with 24-month follow-up.* Journal of Orthopaedic Surgery and Research, 2023. **18**(1).

3. Song, X., et al., *Clinical Efficacy of Bilateral Decompression Using Biportal Endoscopic Versus Minimally Invasive Transforaminal Lumbar Interbody Fusion for the Treatment of Lumbar Degenerative Diseases.* World Neurosurgery, 2023. **173**: p. e371-e377.

4. Heo, D.H. and C.K. Park, *Clinical results of percutaneous biportal endoscopic lumbar interbody fusion with application of enhanced recovery after surgery.* Neurosurgical Focus, 2019. **46**(4).

5. Kim, J.-E., *Comparison of Minimal Invasive Versus Biportal Endoscopic Transforaminal Lumbar Interbody Fusion for Single-level Lumbar Disease.pdf.* 2021.

6. Chen, H., et al., *Comparison of minimally invasive transforaminal lumbar interbody fusion and endoscopic lumbar interbody fusion for lumbar degenerative diseases: a retrospective observational study.* Journal of Orthopaedic Surgery and Research, 2023. **18**(1).

7. Xu, H., et al., *Comparison of Outcomes Between Endoscopic Transforaminal Lumbar Interbody Fusion and Minimally Invasive Transforaminal Lumbar Interbody Fusion in Patients With Single-Level Lumbar Degenerative Disease: A Retrospective Study.* World Neurosurgery, 2024. **183**: p. e98-e108.

8. Ao, S., et al., *Comparison of Preliminary clinical outcomes between percutaneous endoscopic and minimally invasive transforaminal lumbar interbody fusion for lumbar degenerative diseases in a tertiary hospital: Is percutaneous endoscopic procedure superior to MIS-TLIF? A prospective cohort study.* International Journal of Surgery, 2020. **76**: p. 136-143.

9. Huang, X., et al., *Comparison of surgical invasiveness, hidden blood loss, and clinical outcome between unilateral biportal endoscopic and minimally invasive transforaminal lumbar interbody fusion for lumbar degenerative disease: a retrospective cohort study.* BMC Musculoskeletal Disorders, 2023. **24**(1).

10. Zhao, X.b., et al., *Early Clinical Evaluation of Percutaneous Full‐endoscopic Transforaminal Lumbar Interbody Fusion with Pedicle Screw Insertion for Treating Degenerative Lumbar Spinal Stenosis.* Orthopaedic Surgery, 2021. **13**(1): p. 328-337.

11. Kang, M.-S., et al., *Minimally invasive transforaminal lumbar interbody fusion using the biportal endoscopic techniques versus microscopic tubular technique.* The Spine Journal, 2021. **21**(12): p. 2066-2077.

12. Zhang, H., et al., *Percutaneous Endoscopic Transforaminal Lumbar Interbody Fusion: Technique Note and Comparison of Early Outcomes with Minimally Invasive Transforaminal Lumbar Interbody Fusion for Lumbar Spondylolisthesis.* International Journal of General Medicine, 2021. **Volume 14**: p. 549-558.

13. Gatam, A.R., et al., *Unilateral Biportal Endoscopic Lumbar Interbody Fusion: A Technical Note and an Outcome Comparison with the Conventional Minimally Invasive Fusion.* Orthopedic Research and Reviews, 2021. **Volume 13**: p. 229-239.

14. Arunakul, R., et al., *Unilateral biportal endoscopic versus microscopic transforaminal lumbar interbody fusion for lumbar degenerative disease: a retrospective study.* Journal of Orthopaedic Surgery and Research, 2024. **19**(1).

15. Han, H., et al., *Short-term clinical efficacy and safety of unilateral biportal endoscopic transforaminal lumbar interbody fusion versus minimally invasive transforaminal lumbar interbody fusion in the treatment of lumbar degenerative diseases: a systematic review and meta-analysis.* Journal of Orthopaedic Surgery and Research, 2023. **18**(1).

16. He, Y., Q. Cheng, and J. She, *Unilateral biportal endoscopic lumbar interbody fusion versus minimally invasive transforaminal lumbar interbody fusion for single-segment lumbar degenerative disease: a meta-analysis.* BMC Musculoskeletal Disorders, 2024. **25**(1).

17. Li, Y., et al., *Comparison of efficacy between unilateral biportal endoscopic lumbar fusion versus minimally invasive transforaminal lumbar fusion in the treatment of lumbar degenerative diseases: A systematic review and meta-analysis.* Medicine, 2023. **102**(34).

18. Yu, Q., et al., *Unilateral biportal endoscopic transforaminal lumbar interbody fusion versus conventional interbody fusion for the treatment of degenerative lumbar spine disease: a systematic review and meta-analysis.* BMC Musculoskeletal Disorders, 2023. **24**(1).

19. Choi, U.Y., et al., *Unilateral versus bilateral percutaneous pedicle screw fixation in minimally invasive transforaminal lumbar interbody fusion.* Neurosurgical Focus, 2013. **35**(2).

20. Heo, D.H., et al., *Fully endoscopic lumbar interbody fusion using a percutaneous unilateral biportal endoscopic technique: technical note and preliminary clinical results.* Neurosurgical Focus, 2017. **43**(2).

21. Huang, Y., et al., *A comparison of the bilateral decompression via unilateral approach versus conventional approach transforaminal lumbar interbody fusion for the treatment of lumbar degenerative disc disease in the elderly.* BMC Musculoskeletal Disorders, 2021. **22**(1).

22. *<Radiographic Analysis of One-level Minimally Invasive.pdf>.*

23. Dahdaleh, N.S., et al., *Outcome following unilateral versus bilateral instrumentation in patients undergoing minimally invasive transforaminal lumbar interbody fusion: a single-center randomized prospective study.* Neurosurgical Focus, 2013. **35**(2).

24. *<单侧双通道内镜下腰椎融合术治疗腰椎退行性疾病的初步研究.pdf>.*

25. *<单侧双通道内镜下与微创通道下经椎间孔腰椎间融合术治疗腰椎退行性疾病的疗效比较.pdf>.*

26. *<单侧双通道内镜腰椎融合术治疗Ⅰ度腰椎滑脱的.pdf>.*

27. *<单侧双通道内窥镜下腰椎椎间融合术与微创经椎间孔入路.pdf>.*

28. *<单轴孔镜减压-双通道镜下可视腰椎融合术治疗(1).pdf>.*

29. *<倾向性评分匹配两种腰椎融合方案治疗单节段腰椎退行性疾病.pdf>.*

30. *<Clinical Effect of Unilateral Biportal Endoscopic Lumbar Interbody Fusion and Minimally Invasive Transforaminal Lumbar Interbody Fusion on Single-segment Lumbar Stenosis with Instability.pdf>.*

31. *<单侧双通道脊柱内镜与 3D 显微镜辅助经椎间孔腰椎椎体间融合术治疗腰椎滑脱症的中期疗效比较.pdf>.*

32. *<单侧双通道内镜辅助后路腰椎椎间融合术与.pdf>.*

**eTable 3.** Analysis of publication bias for outcomes between ULIF and MIS-TLIF by non-parametric T-F method.

| Outcome | SMD (95% CI) | T-F adjusted SMD (95% CI) | Begg's P | Filled studies |
| --- | --- | --- | --- | --- |
| Post. VAS-back score |  |  |  |  |
| 1 month | -0.99(-1.32, -0.66） | -1.09(-1.45, -0.73) | 0.0042 | 1 |
| 3 months | -0.45(-0.68, -0.21) | -0.45(-0.68, -0.21) | 0.0635 | 0 |
| Post. ODI score |  |  |  |  |
| 1 month | -0.61(-1.07, -0.16) | -0.86(-1.36 ,-0.35) | 0.0354 | 2 |
| Operation time (min) | 1.87 (1.15, 2.59) | 2.39 (1.51, 3.26) | 0.0327 | 3 |
| Blood loss (ml) | -2.88 (-3.78, -1.97) | -3.82 (-5.22, -2.43) | 0.0003 | 3 |
| Length of stay (day) | -1.02 (-1.59, -0.45) | -1.02(-1.59, -0.45) | 0.0165 | 0 |

**Abbreviations:** CI=confidence interval; ODI=Oswestry Disability Index; VAS=Visual Analog Scale

**eFigure 1.** Funnel plots for meta-analysis of association between VAS score and ULIF versus MIS-TLIF .


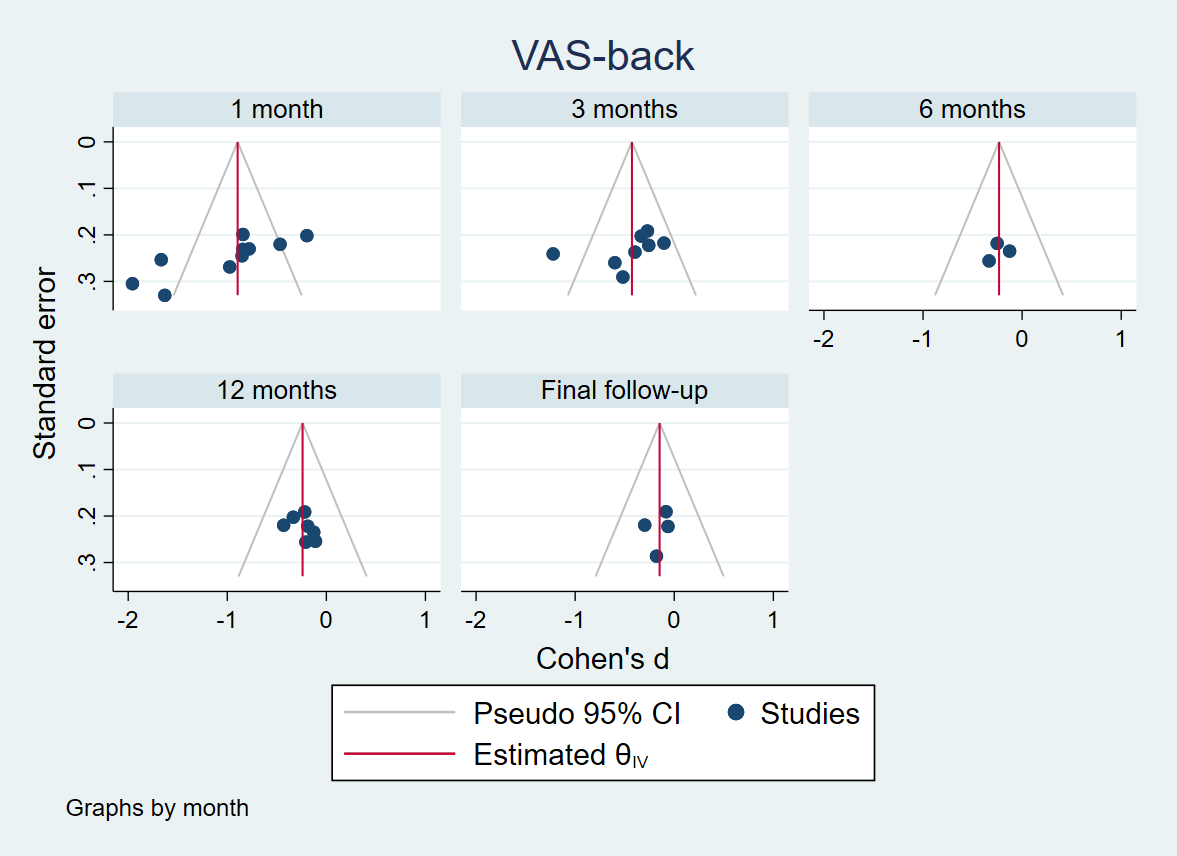


**eFigure 2.** Funnel plots for meta-analysis of association between VAS score and ULIF versus MIS-TLIF by non-parametric T-F method.

**
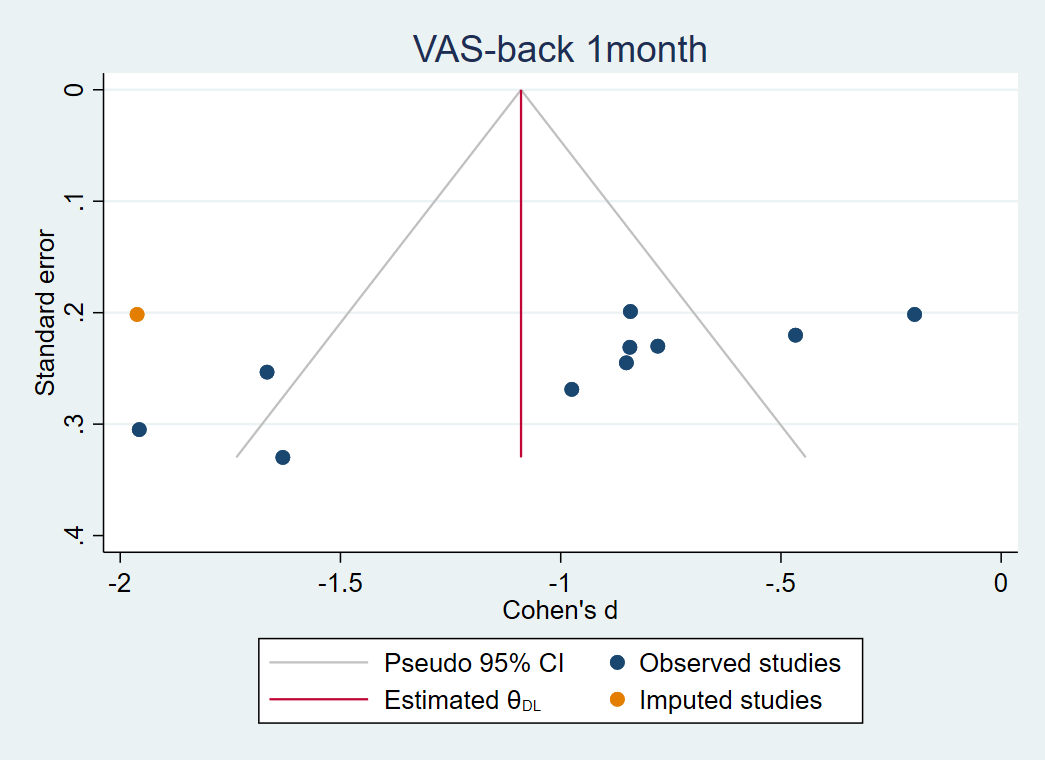
**

**eFigure 3.** Funnel plots for meta-analysis of association between ODI score and ULIF versus MIS-TLIF .

**
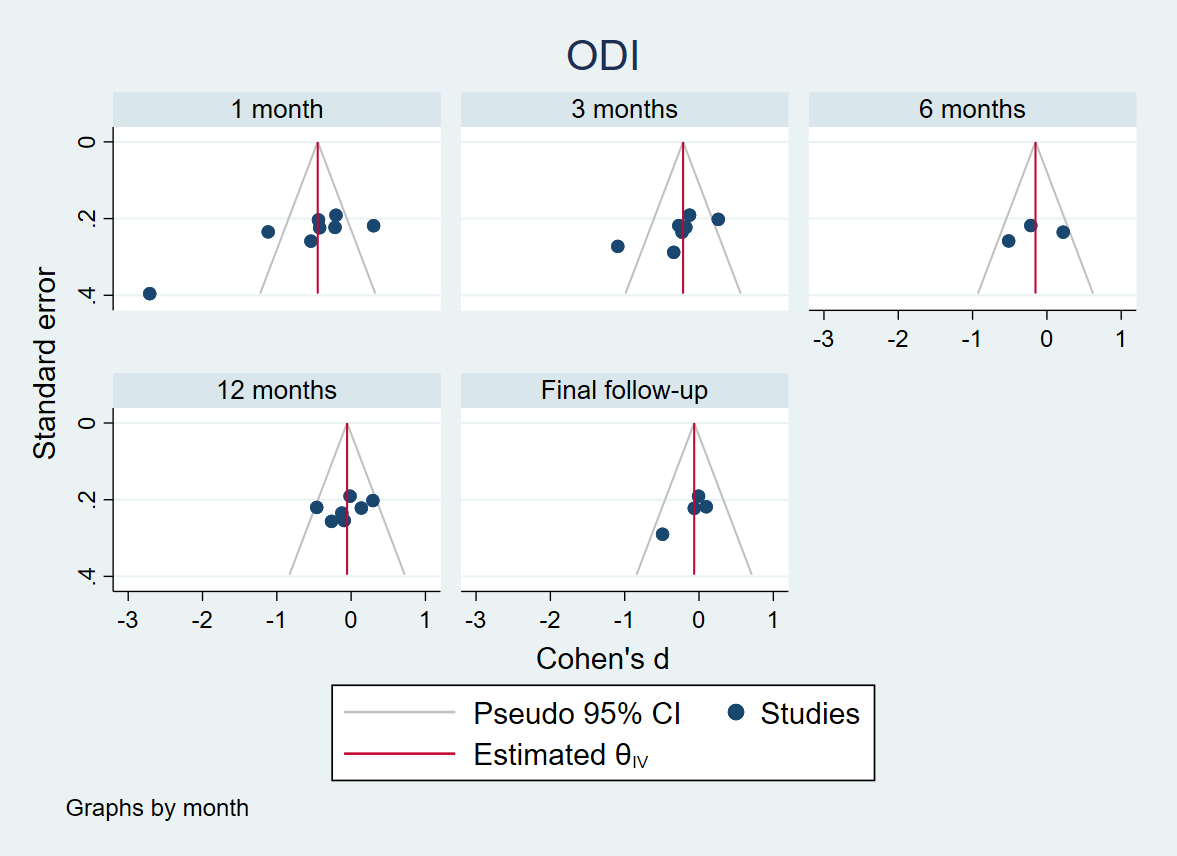
**

**eFigure 4.** Begg’test for meta-analysis of association between ODI score (1 month) and ULIF versus MIS-TLIF.


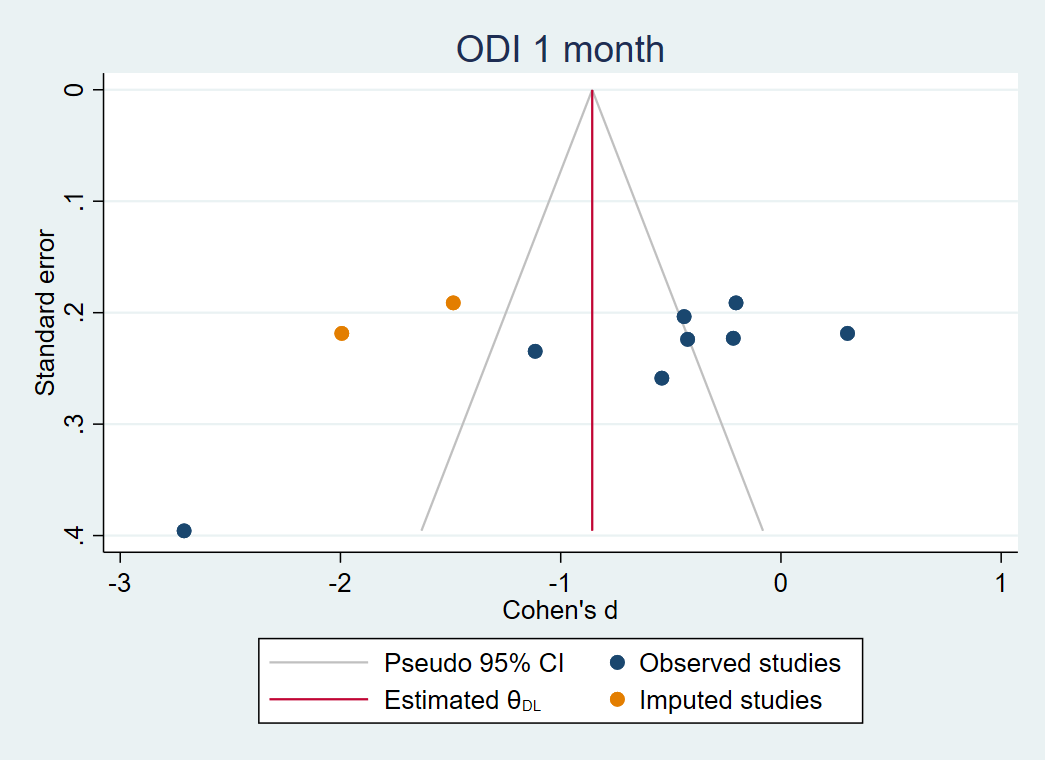


**eFigure 5.** Sensitivity Analysis for Operative time of ULIF versus MIS-TLIF .


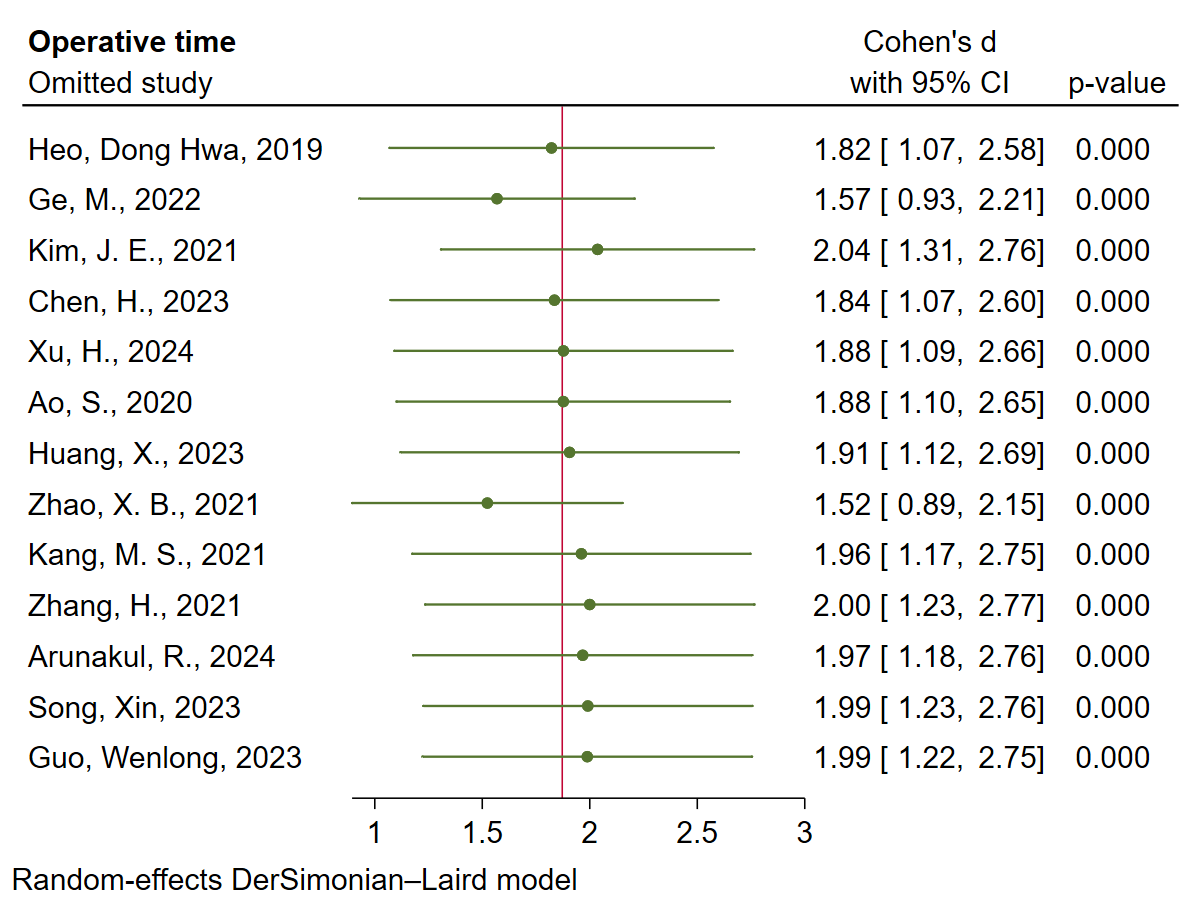
.

**eFigure 6.** Funnel plots for meta-analysis of association between Operative time and ULIF versus MIS-TLIF .

**
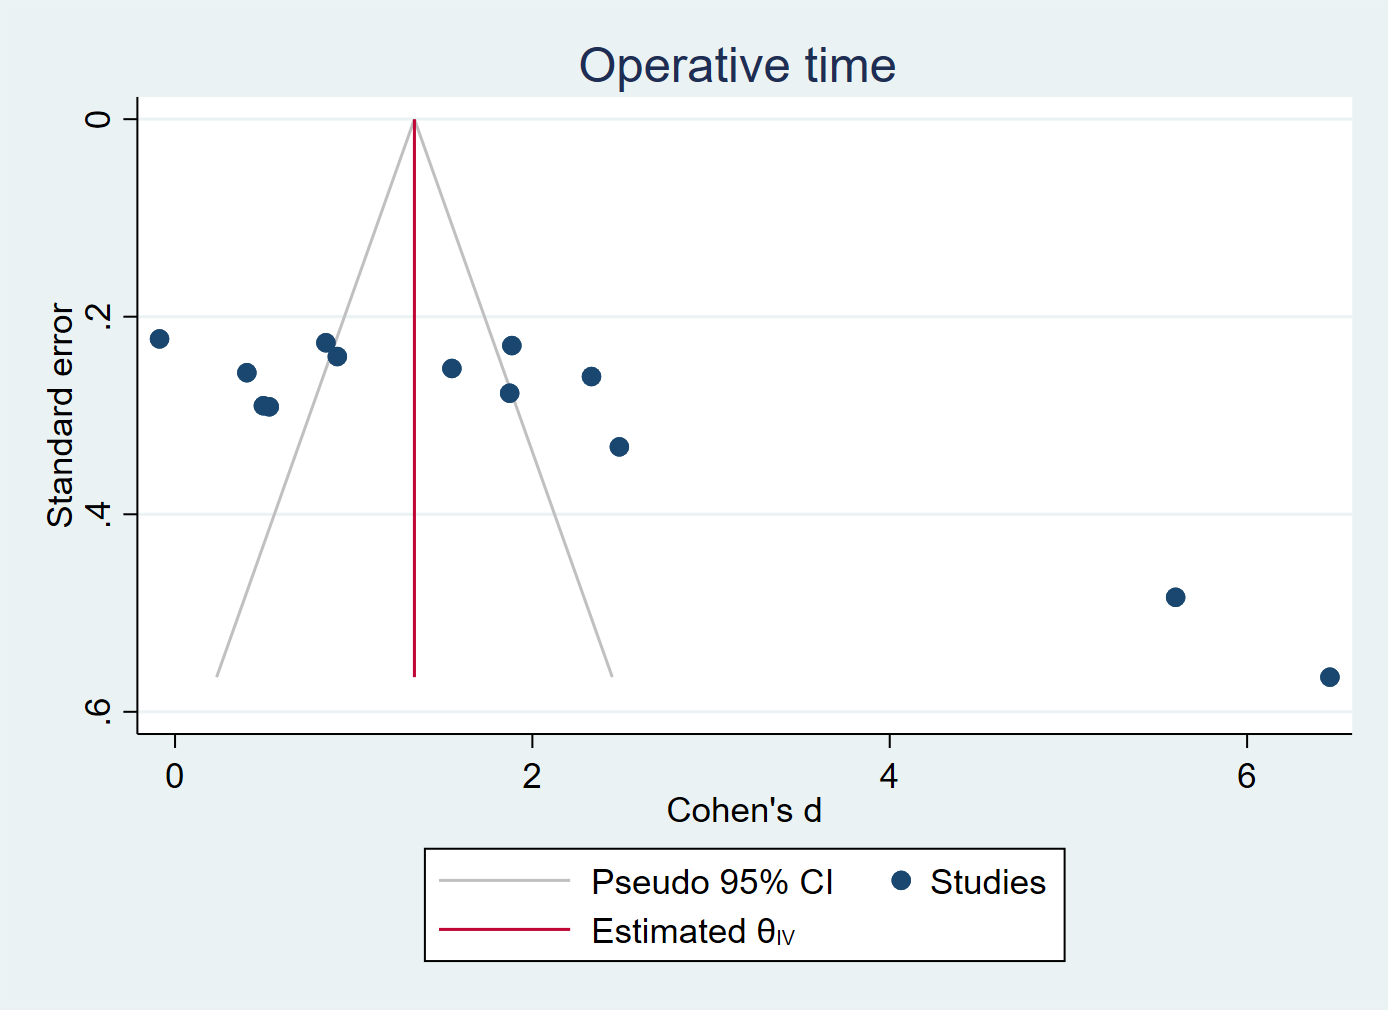
**

**eFigure 7.** Funnel plots for meta-analysis of association between Operative time and ULIF versus MIS-TLIF by non-parametric T-F method.

**
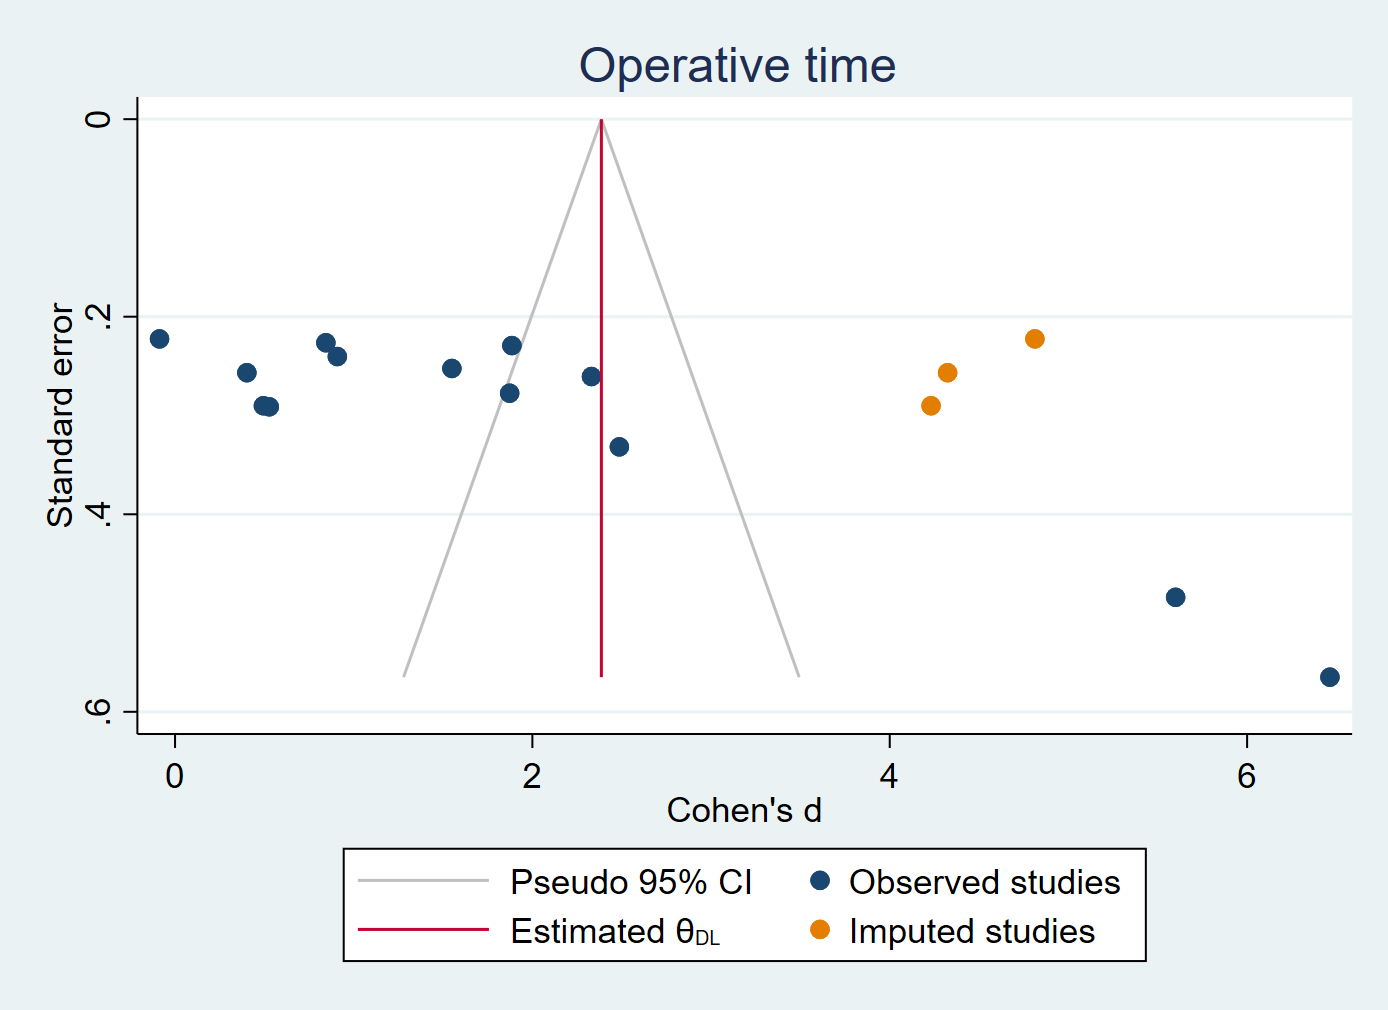
**

**eFigure 8.** Sensitivity Analysis for Blood loss of ULIF versus MIS-TLIF.


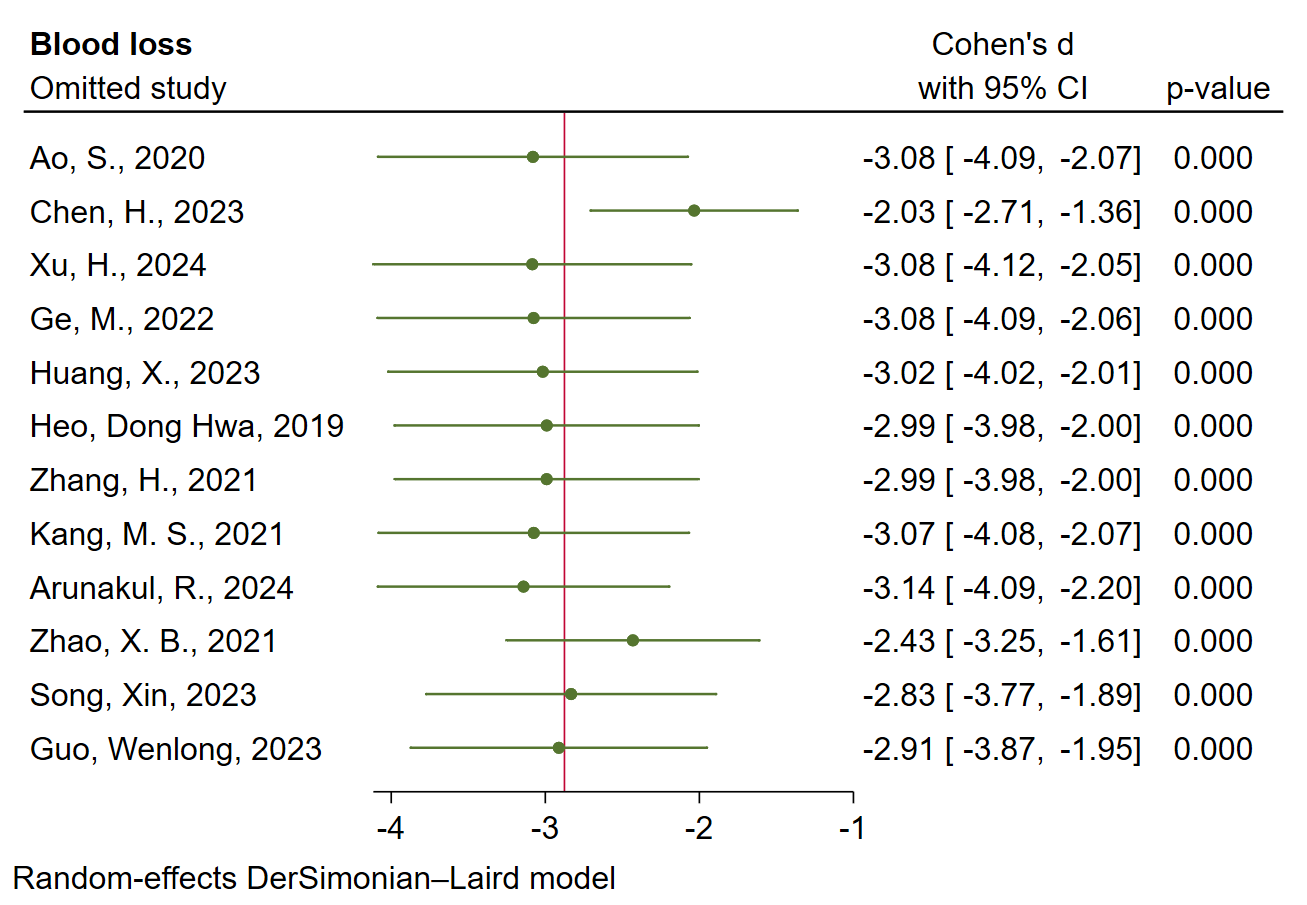


**eFigure 9.** Funnel plots for meta-analysis of association between Blood loss and ULIF versus MIS-TLIF.


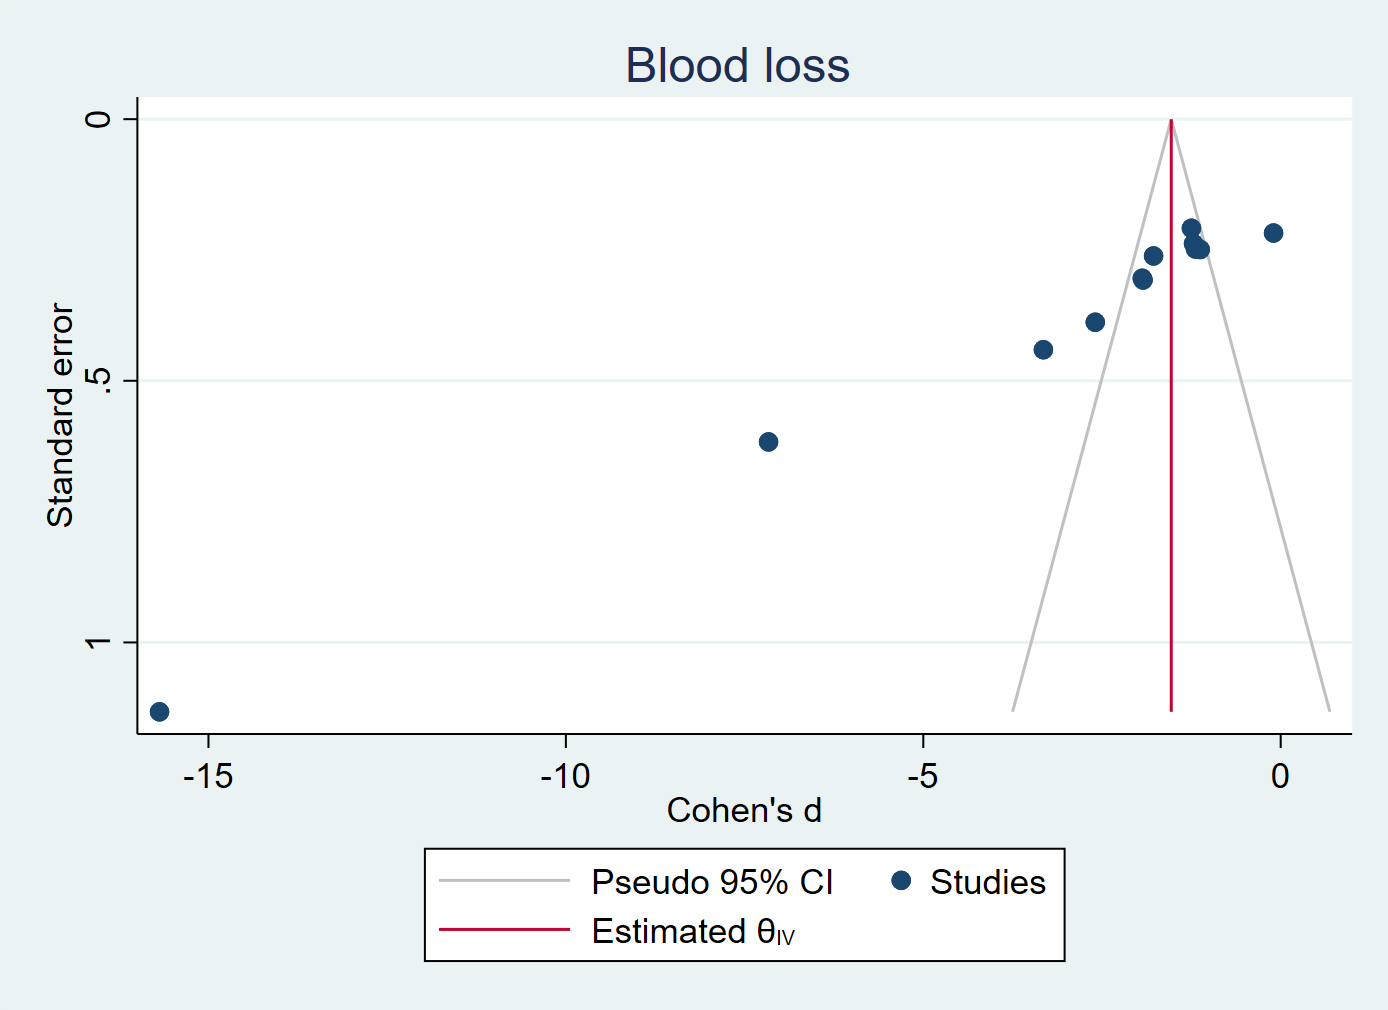


**eFigure 10.** Funnel plots for meta-analysis of association between Blood loss and ULIF versus MIS-TLIF by non-parametric T-F method.


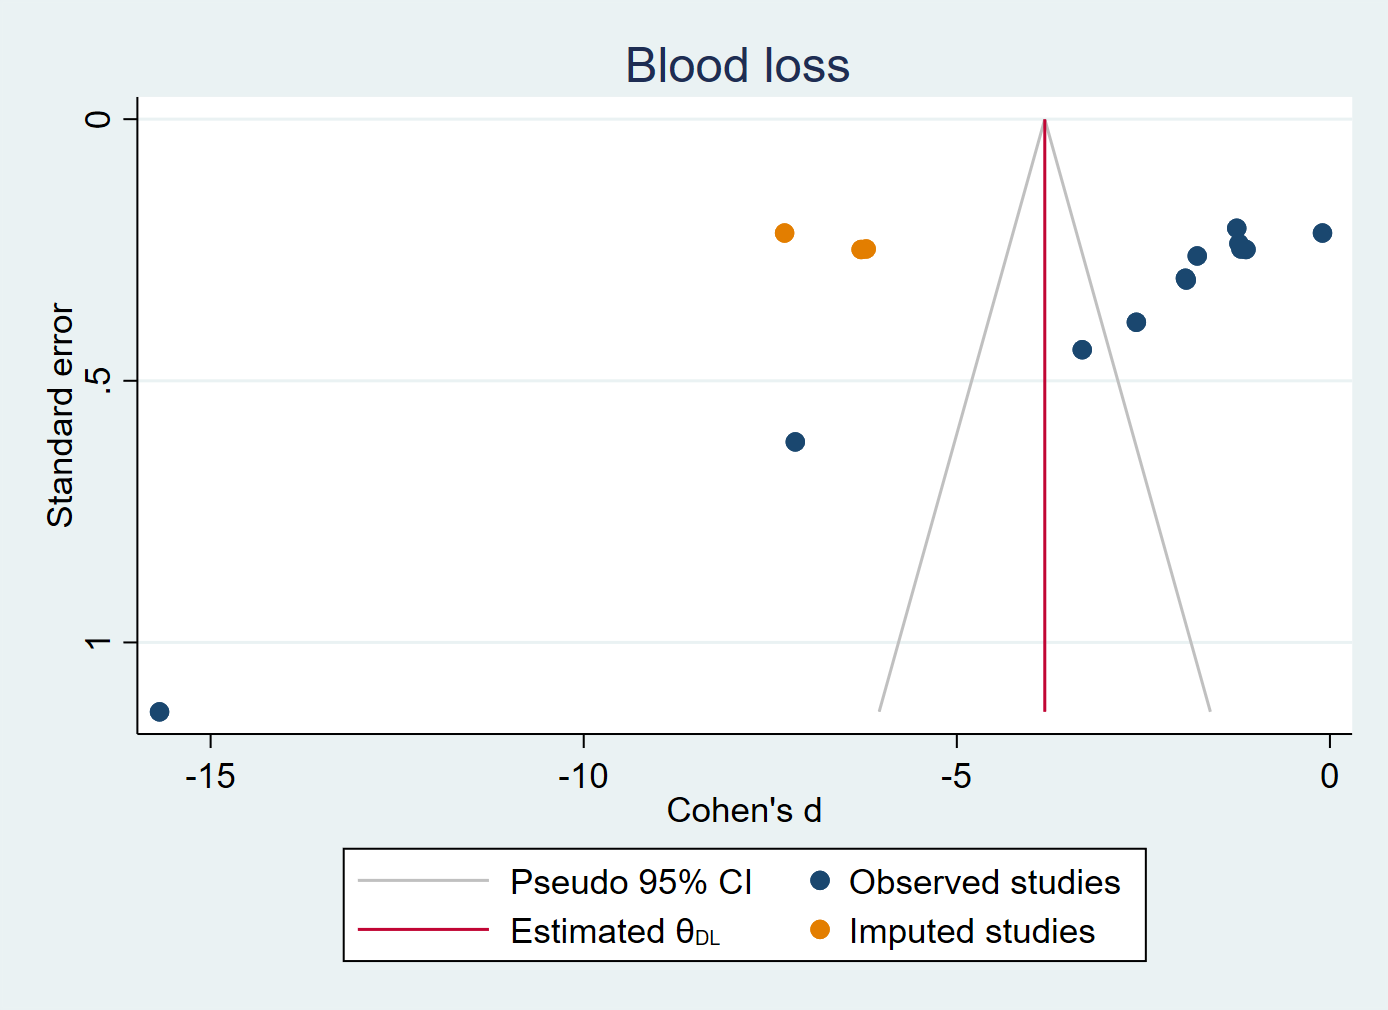


**eFigure 11.** Sensitivity Analysis for Hospital stay of ULIF versus MIS-TLIF.


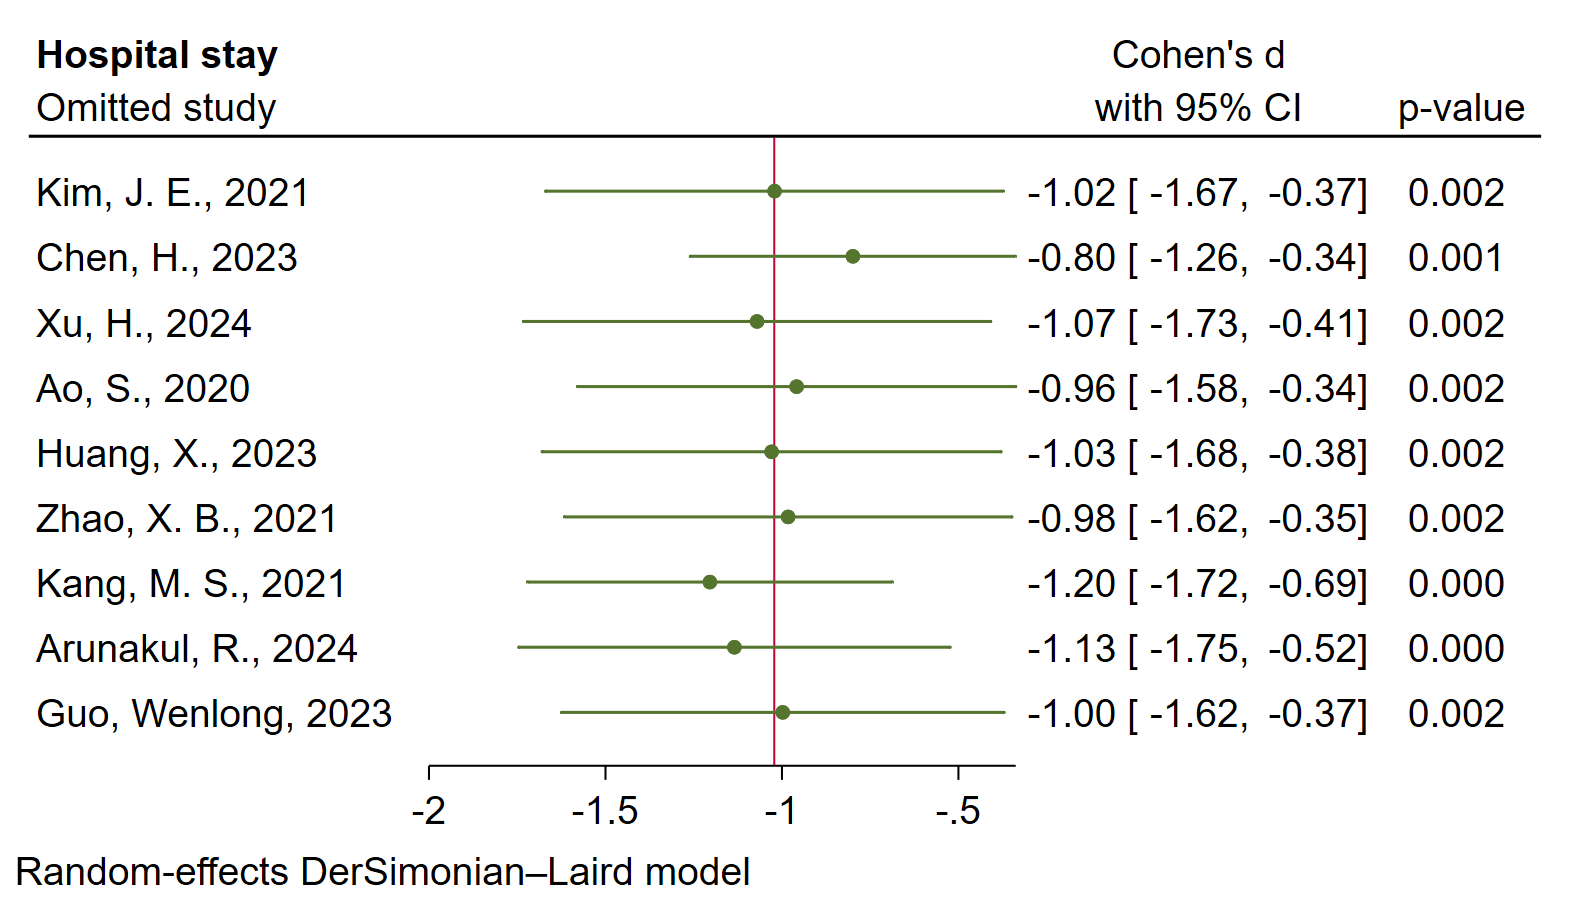


**eFigure 12.** Funnel plots for meta-analysis of association between Hospital stay and ULIF versus MIS-TLIF.


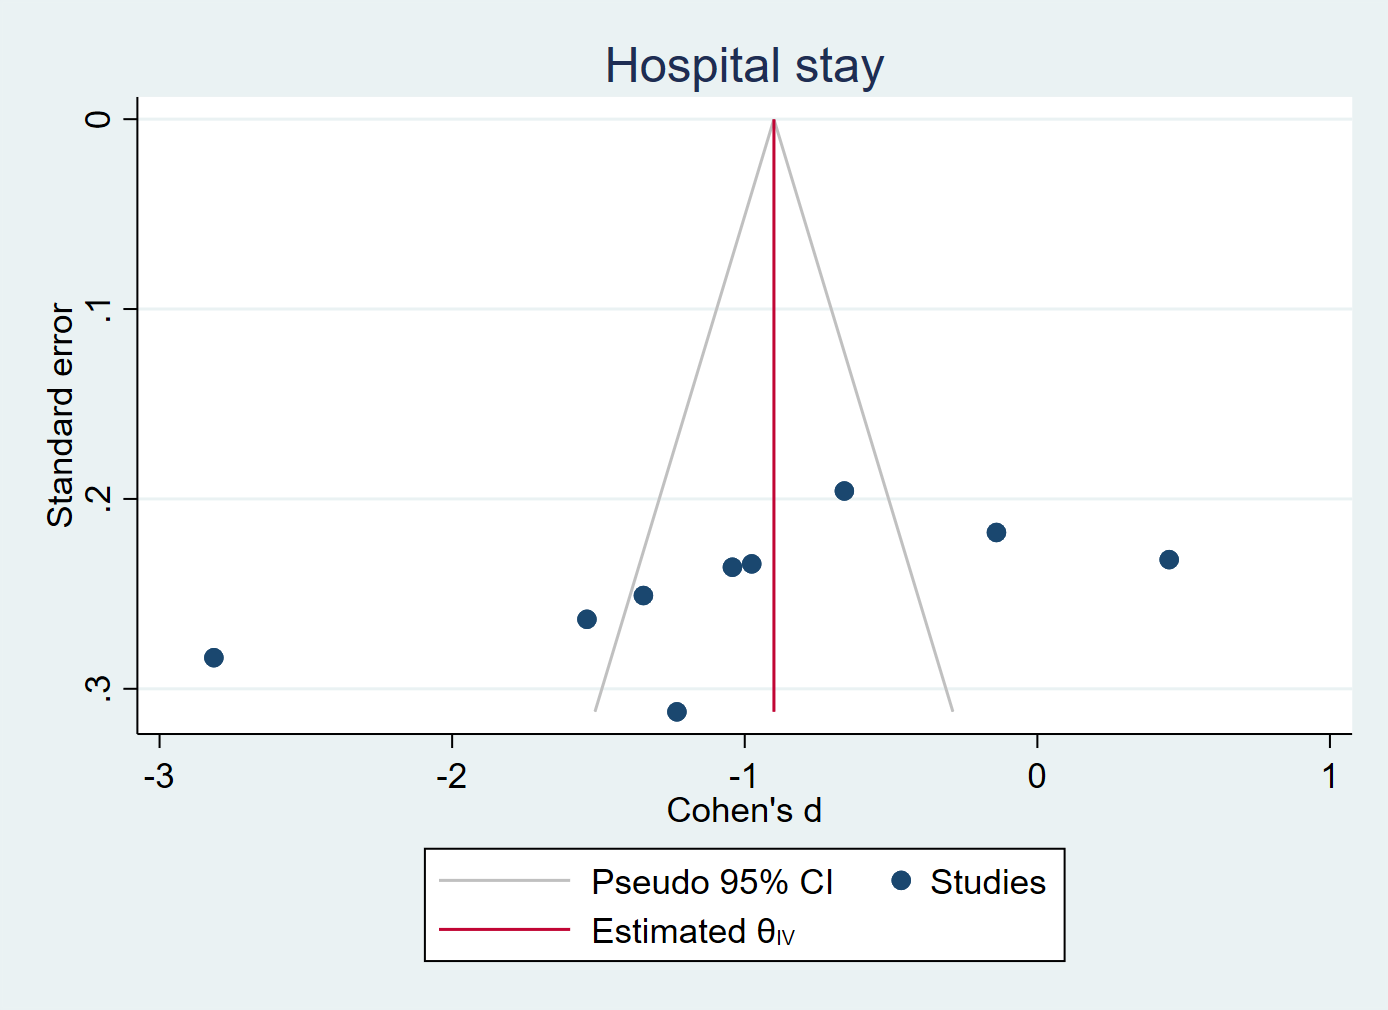

Supplement: Supplementary file 1 [file 48456f67d36e818935f9d713.docx]
